# Supplementary material
Source: PeerJ journal article supplement (doi:10.7717/peerj-cs.3874)
Supplement: AppendixStaffYH.pdf [file AppendixStaffYH.pdf]

# Appendix

## Hyperparameter Settings

Table S1 lists the encoder and spiking neuron parameters used in all experiments. The values are fixed across datasets and prediction horizons for consistency.

Table 1: **Table S1.** Hyperparameters for encoder and spiking neurons.

| Component / Parameter | Symbol      | Value |
|-----------------------|-------------|-------|
| Sub-steps per step    | $T_s$       | 4     |
| Membrane decay factor | $\beta$     | 0.99  |
| Threshold             | $V_{th}$    | 1.0   |
| Reset potential       | $V_{reset}$ | 0     |
| Surrogate slope       | $\alpha$    | 2     |

## Dataset and Training Setup

For reproducibility, we provide the detailed dataset preprocessing and training configurations. The settings include optimizer, learning rate, batch size, early stopping criteria, and key architectural parameters. Dataset splits follow chronological order to prevent information leakage. These details are summarized in Table S2.

Table 2: **Table S2.** Dataset and training configuration.

| Component           | Electricity | Solar-Energy |
|---------------------|-------------|--------------|
| Window size ( $P$ ) | 168         | 168          |
| Optimizer           | Adam        | Adam         |
| Learning rate       | 0.001       | 0.001        |
| Batch size          | 24          | 48           |
| Early stopping      | 30          | 30           |
| Kernel size         | 16          | 64           |
| Hidden size         | 64          | 64           |
| Num. levels         | 3           | 3            |
| Dilation            | 2           | 2            |
| Num. steps          | 4           | 4            |
| Stride              | 1           | 1            |
